# Supplementary material for: A computational exploration of imprinted polymer affinity based on voriconazole metabolites
Source: Royal Society of Chemistry journal article supplement (doi:10.1039/c3an01721d), 2014-01-01
Supplement: c3an01721d1.pdf [file c3an01721d1.pdf]

## **Electronic supplementary information**

### **A computational exploration of imprinted polymers affinity based on voriconazole metabolites**

**M. Sobiech, T. Żolek, P. Luliński and D. Maciejewska<sup>1</sup>**

*Department of Organic Chemistry, Faculty of Pharmacy, Medical University of Warsaw,  
Banacha 1, 02-097 Warsaw, Poland*

---

<sup>1</sup> Corresponding author: Department of Organic Chemistry, Faculty of Pharmacy, Medical University of Warsaw, 02-097 Warsaw, Poland. E-mail: [dmaciejewska@wum.edu.pl](mailto:dmaciejewska@wum.edu.pl); Tel/Fax: +48 225720643

## Molecular modelling: molecules and methods

**Table S1.** ESP partial charges for the molecules (1), (1) in polymer, ethylene glycol dimethacrylate, ethylene glycol dimethacrylate in polymer and L1; In square brackets [RMS] values.

| (1)<br>[0.00394] |        | (1)<br>(in polymer)<br>[0.00373] |        | ethylene glycol<br>dimethacrylate<br>[0.00246] |        | ethylene glycol<br>dimethacrylate<br>(in polymer) <br>[0.00194] |        | L1<br>[0.00374] |        |
|------------------|--------|----------------------------------|--------|------------------------------------------------|--------|-----------------------------------------------------------------|--------|-----------------|--------|
| Atom             | ESP    | Atom                             | ESP    | Atom                                           | ESP    | Atom                                                            | ESP    | Atom            | ESP    |
| C                | 0.027  | C                                | 0.249  | C                                              | -0.310 | C                                                               | -0.307 | F               | -0.208 |
| C                | -0.404 | C                                | -0.184 | C                                              | -0.022 | C                                                               | 0.208  | F               | -0.192 |
| C                | -0.005 | C                                | -0.164 | C                                              | -0.092 | C                                                               | -0.144 | O               | -0.467 |
| C                | 0.167  | C                                | 0.061  | H                                              | 0.034  | H                                                               | 0.034  | N               | -0.615 |
| C                | -0.165 | C                                | -0.146 | H                                              | 0.051  | H                                                               | 0.04   | N               | -0.588 |
| H                | 0.102  | H                                | 0.092  | H                                              | 0.040  | H                                                               | 0.037  | N               | 0.269  |
| C                | -0.064 | C                                | -0.084 | H                                              | 0.134  | H                                                               | 0.061  | C               | 0.528  |
| H                | 0.086  | H                                | 0.088  | H                                              | 0.154  | H                                                               | 0.086  | H               | 0.023  |
| C                | -0.116 | C                                | -0.116 | C                                              | 0.632  | C                                                               | 0.614  | C               | 0.220  |
| H                | 0.092  | H                                | 0.086  | O                                              | -0.498 | O                                                               | -0.496 | H               | 0.083  |
| C                | -0.056 | C                                | -0.046 | O                                              | -0.365 | O                                                               | -0.456 | C               | -0.187 |
| H                | 0.082  | H                                | 0.077  | C                                              | 0.122  | C                                                               | 0.166  | H               | 0.126  |
| C                | -0.191 | C                                | -0.190 | H                                              | 0.063  | H                                                               | 0.066  | H               | 0.051  |
| H                | 0.115  | H                                | 0.101  | H                                              | 0.055  | H                                                               | 0.045  | C               | 0.616  |
| H                | 0.028  | H                                | 0.052  | C                                              | 0.122  | C                                                               | 0.167  | C               | -0.316 |
| H                | 0.014  | H                                | 0.023  | O                                              | -0.365 | O                                                               | -0.457 | C               | 0.386  |
| H                | 0.002  | H                                | 0.006  | C                                              | 0.632  | C                                                               | 0.614  | C               | -0.390 |
| H                | 0.133  | H                                | 0.054  | C                                              | -0.022 | C                                                               | 0.208  | H               | 0.197  |
| H                | 0.153  | H                                | -0.025 | C                                              | -0.310 | C                                                               | -0.307 | C               | 0.444  |
|                  |        | H                                | 0.047  | H                                              | 0.154  | H                                                               | 0.086  | C               | -0.315 |
|                  |        | H                                | 0.022  | H                                              | 0.134  | H                                                               | 0.061  | H               | 0.167  |
|                  |        |                                  |        | C                                              | -0.092 | C                                                               | -0.144 | C               | 0.064  |
|                  |        |                                  |        | H                                              | 0.051  | H                                                               | 0.04   | H               | 0.104  |
|                  |        |                                  |        | H                                              | 0.034  | H                                                               | 0.034  |                 |        |
|                  |        |                                  |        | H                                              | 0.040  | H                                                               | 0.037  |                 |        |
|                  |        |                                  |        | O                                              | -0.498 | O                                                               | -0.496 |                 |        |
|                  |        |                                  |        | H                                              | 0.063  | H                                                               | 0.066  |                 |        |
|                  |        |                                  |        | H                                              | 0.055  | H                                                               | 0.044  |                 |        |
|                  |        |                                  |        | H                                              | 0.071  |                                                                 |        |                 |        |
|                  |        |                                  |        | H                                              | -0.026 |                                                                 |        |                 |        |
|                  |        |                                  |        | H                                              | -0.025 |                                                                 |        |                 |        |
|                  |        |                                  |        | H                                              | 0.072  |                                                                 |        |                 |        |

**Table S2.** ESP partial charges for the molecules **L2 - L6**. In square brackets [RMS] values.

| <b>L2</b><br>[0.00324] |            | <b>L3</b><br>[0.00303] |            | <b>L4</b><br>[0.00369] |            | <b>L5</b><br>[0.00291] |            | <b>L6</b><br>[0.00297] |            |
|------------------------|------------|------------------------|------------|------------------------|------------|------------------------|------------|------------------------|------------|
| <b>Atom</b>            | <b>ESP</b> |
| C                      | -0.297     | C                      | -0.266     | F                      | -0.214     | O                      | -0.517     | F                      | -0.212     |
| H                      | 0.151      | H                      | 0.143      | F                      | -0.209     | O                      | -0.633     | F                      | -0.204     |
| H                      | 0.044      | H                      | 0.033      | O                      | -0.637     | O                      | -0.602     | N                      | -0.637     |
| C                      | 0.343      | C                      | 0.380      | N                      | -0.627     | O                      | -0.663     | N                      | -0.601     |
| C                      | -0.096     | C                      | -0.052     | N                      | -0.577     | O                      | -0.441     | N                      | 0.47       |
| H                      | 0.061      | H                      | 0.043      | N                      | 0.236      | O                      | -0.638     | C                      | 0.487      |
| C                      | -0.030     | C                      | -0.017     | C                      | 0.519      | O                      | -0.525     | H                      | 0.048      |
| H                      | 0.022      | H                      | 0.016      | H                      | 0.026      | C                      | 0.137      | C                      | 0.173      |
| H                      | -0.017     | H                      | -0.022     | C                      | 0.225      | C                      | 0.155      | H                      | 0.118      |
| H                      | 0.023      | H                      | 0.019      | H                      | 0.100      | C                      | 0.25       | C                      | -0.692     |
| C                      | 0.542      | C                      | 0.271      | C                      | -0.185     | C                      | 0.137      | H                      | 0.212      |
| C                      | 0.672      | C                      | 0.178      | H                      | 0.057      | C                      | 0.577      | H                      | 0.144      |
| H                      | -0.001     | H                      | 0.103      | H                      | 0.110      | C                      | 0.748      | C                      | 0.881      |
| C                      | 0.408      | C                      | -0.115     | C                      | 0.592      | H                      | 0.007      | C                      | -0.215     |
| H                      | 0.062      | H                      | 0.181      | C                      | -0.299     | H                      | 0.091      | C                      | 0.304      |
| C                      | -0.123     | C                      | 0.127      | C                      | 0.352      | H                      | 0.03       | C                      | -0.342     |
| C                      | 0.184      | C                      | 0.181      | C                      | -0.363     | H                      | 0.035      | H                      | 0.190      |
| H                      | 0.103      | H                      | 0.104      | H                      | 0.191      | H                      | -0.052     | C                      | 0.386      |
| C                      | 0.465      | C                      | 0.473      | C                      | 0.407      | H                      | 0.0423     | C                      | -0.315     |
| H                      | 0.050      | H                      | 0.049      | C                      | -0.323     | H                      | 0.384      | H                      | 0.161      |
| C                      | 0.024      | C                      | -0.006     | H                      | 0.163      | H                      | 0.441      | C                      | 0.006      |
| C                      | -0.075     | C                      | -0.067     | C                      | 0.022      | H                      | 0.434      | H                      | 0.103      |
| H                      | 0.130      | H                      | 0.128      | H                      | 0.106      | F                      | -0.198     | H                      | -0.075     |
| C                      | -0.284     | C                      | -0.290     | H                      | 0.362      | O                      | -0.725     | O                      | -0.643     |
| H                      | 0.159      | H                      | 0.162      | H                      | -0.034     | N                      | -0.612     | O                      | -0.641     |
| C                      | 0.379      | C                      | 0.384      |                        |            | N                      | -0.564     | O                      | -0.600     |
| C                      | -0.371     | C                      | -0.381     |                        |            | N                      | 0.304      | O                      | -0.643     |
| H                      | 0.200      | H                      | 0.203      |                        |            | C                      | 0.485      | O                      | -0.612     |
| C                      | 0.301      | C                      | 0.316      |                        |            | H                      | 0.037      | O                      | -0.634     |
| F                      | -0.153     | F                      | -0.152     |                        |            | C                      | 0.197      | O                      | -0.534     |
| F                      | -0.214     | F                      | -0.215     |                        |            | H                      | 0.102      | C                      | 0.26       |
| F                      | -0.209     | F                      | -0.208     |                        |            | C                      | -0.378     | C                      | 0.056      |
| N                      | 0.376      | N                      | 0.363      |                        |            | H                      | 0.154      | C                      | 0.047      |
| N                      | -0.610     | N                      | -0.612     |                        |            | H                      | 0.095      | C                      | 0.289      |
| N                      | -0.611     | N                      | -0.611     |                        |            | C                      | 0.623      | C                      | 0.666      |
| N                      | -0.698     | N                      | -0.448     |                        |            | C                      | -0.183     | C                      | 0.729      |
| N                      | -0.667     | N                      | 0.340      |                        |            | C                      | 0.301      | H                      | -0.003     |
| O                      | -0.635     | O                      | -0.632     |                        |            | C                      | -0.395     | H                      | 0.118      |
| H                      | 0.392      | H                      | 0.370      |                        |            | H                      | 0.195      | H                      | 0.055      |
|                        |            | O                      | -0.473     |                        |            | C                      | 0.512      | H                      | -0.009     |
|                        |            |                        |            |                        |            | C                      | -0.371     | H                      | 0.022      |

|   |        |   |       |
|---|--------|---|-------|
| H | 0.171  | H | 0.419 |
| C | -0.033 | H | 0.382 |
| H | 0.143  | H | 0.451 |
| H | 0.421  | H | 0.435 |
| H | -0.059 |   |       |

### Evaluation of the theoretical systems $P_M$ and $P_{MC}$

Figs. S1 and S2 shows the binding capacity versus the complexation energies in two systems,  $P_{MC}$  and  $P_M$ .

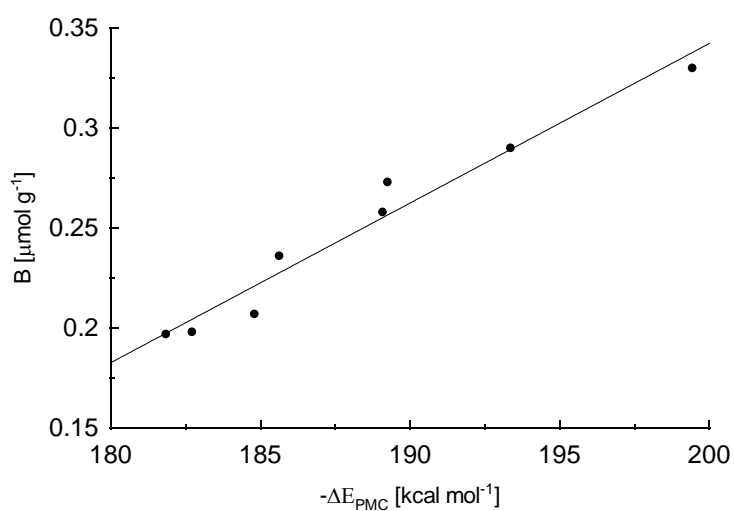

Fig. S1. The plot of experimental binding capacities  $B$  versus  $\Delta E_{PMC}$ .

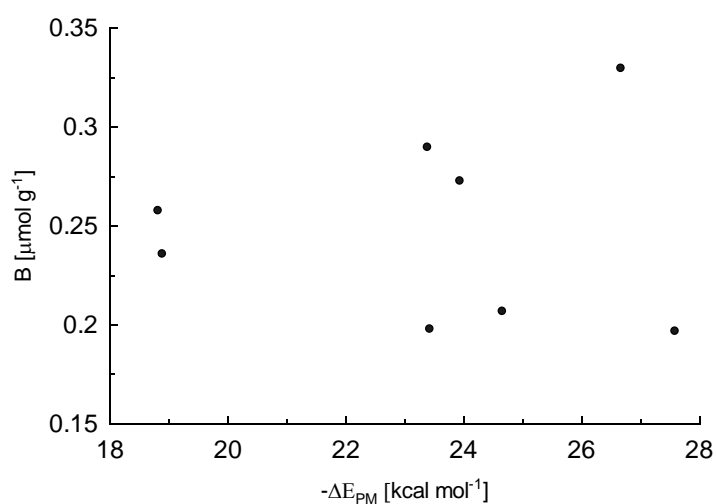

Fig. S2. The plot of experimental binding capacities  $B$  versus  $\Delta E_{PM}$ .

As can be seen, the correlation exists only for  $P_{MC}$  system.

The presented correlations together with the intermolecular interactions analysis in  $P_{MC}$  system showed that the intermolecular interactions with the cross-linker are crucial for the selectivity studies of polymer matrix.
